# Supplementary material
Source: Springer Nature journal article supplement (https://publikationen.ub.uni-frankfurt.de/opus4/files/35269/13104_2014_3224_MOESM2_ESM.pdf)
Supplement: MOESM2 [file 13104_2014_3224_MOESM2_ESM.pdf]

**Suppl. Table 1A.** Influence of PLX4032, PLX4720, or the ABCG2 inhibitor fumitremorgin C on the concentration of the ABCG2 substrate mitoxantrone that decreases the viability of ABCG2-expressing UKF-NB-3<sup>ABCG2</sup> cells by 50% (IC<sub>50</sub>).

|                        | cell viability in the absence of mitoxantrone (%) | IC <sub>50</sub> mitoxantrone (ng/mL) | fold sensitisation relative to mitoxantrone alone |
|------------------------|---------------------------------------------------|---------------------------------------|---------------------------------------------------|
| <b>PLX4032 (μM)</b>    |                                                   |                                       |                                                   |
| 0                      | 100.00 ± 0.00                                     | 42.24 ± 8.94                          | 1.00                                              |
| 0.625                  | 90.34 ± 3.43                                      | 43.05 ± 8.24                          | 0.98                                              |
| 1.25                   | 88.62 ± 6.64                                      | 32.57 ± 11.09                         | 1.30                                              |
| 2.5                    | 93.69 ± 7.92                                      | 7.42 ± 1.82*                          | 5.69                                              |
| 5                      | 81.83 ± 12.65                                     | 0.97 ± 0.02*                          | 43.55                                             |
| 10                     | 87.06 ± 11.90                                     | 0.48 ± 0.05*                          | 88.00                                             |
| 20                     | 60.56 ± 5.03                                      | 0.39 ± 0.12*                          | 108.31                                            |
| fumitremorgin C (10μM) | 77.44 ± 7.14                                      | 0.12 ± 0.04*                          | 352.00                                            |
| <b>PLX4720 (μM)</b>    |                                                   |                                       |                                                   |
| 0                      | 100.00 ± 0.00                                     | 42.05 ± 10.35                         | 1.00                                              |
| 0.625                  | 82.39 ± 16.17                                     | 26.47 ± 1.35*                         | 1.59                                              |
| 1.25                   | 93.05 ± 8.22                                      | 3.61 ± 1.80*                          | 11.65                                             |
| 2.5                    | 88.62 ± 6.00                                      | 1.38 ± 0.63*                          | 30.47                                             |
| 5                      | 84.91 ± 7.90                                      | 0.59 ± 0.05*                          | 71.27                                             |
| 10                     | 63.61 ± 4.99                                      | 0.35 ± 0.04*                          | 120.14                                            |
| 20                     | 46.20 ± 2.20                                      | 0.29 ± 0.02*                          | 145.00                                            |
| fumitremorgin C (10μM) | 69.95 ± 4.30                                      | 0.13 ± 0.03*                          | 323.46                                            |

\* p < 0.05 relative to mitoxantrone alone

**Suppl. Table 1B.** Influence of PLX4032 or the ABCG2 inhibitor fumitremorgin C on the concentration of the ABCG2 substrate mitoxantrone that decreases the viability of UKF-NB-3 cells by 50% (IC<sub>50</sub>).

| PLX4032 (μM)         | cell viability in the absence of mitoxantrone (%) | IC <sub>50</sub> mitoxantrone (ng/mL) | fold sensitisation relative to mitoxantrone alone |
|----------------------|---------------------------------------------------|---------------------------------------|---------------------------------------------------|
| 0                    | 100.00 ± 0.00                                     | 0.15 ± 0.06                           | 1.00                                              |
| 0.625                | 98.05 ± 13.44                                     | 0.13 ± 0.04                           | 1.15                                              |
| 1.25                 | 90.86 ± 10.91                                     | 0.16 ± 0.05                           | 0.94                                              |
| 2.5                  | 102.50 ± 12.12                                    | 0.17 ± 0.07                           | 0.88                                              |
| 5                    | 86.77 ± 10.71                                     | 0.12 ± 0.06                           | 1.25                                              |
| 10                   | 71.27 ± 8.01                                      | 0.13 ± 0.07                           | 1.15                                              |
| 20                   | 59.98 ± 10.55                                     | 0.14 ± 0.03                           | 1.07                                              |
| fumitremorgin C (μM) |                                                   |                                       |                                                   |
| 10                   | 91.30 ± 13.44                                     | 0.14 ± 0.04                           | 1.07                                              |

**Suppl. Table 1C.** Influence of PLX4720 or the ABCG2 inhibitor fumitremorgin C on the concentration of the ABCG2 substrate mitoxantrone that decreases the viability of UKF-NB-3 cells by 50% (IC<sub>50</sub>).

| PLX4720 (μM)         | cell viability in the absence of mitoxantrone (%) | IC <sub>50</sub> mitoxantrone (ng/mL) | fold sensitisation relative to mitoxantrone alone |
|----------------------|---------------------------------------------------|---------------------------------------|---------------------------------------------------|
| 0                    | 100.00 ± 0.00                                     | 0.17 ± 0.08                           | 1.00                                              |
| 0.625                | 94.58 ± 12.24                                     | 0.19 ± 0.05                           | 0.89                                              |
| 1.25                 | 88.62 ± 11.84                                     | 0.14 ± 0.06                           | 1.21                                              |
| 2.5                  | 92.68 ± 13.32                                     | 0.15 ± 0.04                           | 1.13                                              |
| 5                    | 79.22 ± 12.53                                     | 0.19 ± 0.03                           | 0.89                                              |
| 10                   | 63.16 ± 15.05                                     | 0.15 ± 0.05                           | 1.13                                              |
| 20                   | 43.49 ± 8.99                                      | 0.15 ± 0.04                           | 1.13                                              |
| fumitremorgin C (μM) |                                                   |                                       |                                                   |
| 10                   | 88.57 ± 11.64                                     | 0.16 ± 0.05                           | 1.06                                              |

**Suppl. Table 1D.** Influence of PLX4032 or the ABCG2 inhibitor fumitremorgin C on the concentration of the ABCG2 substrate mitoxantrone that decreases the viability of UKF-NB-3 cells transduced with an empty control vector (as comparison to UKF-NB-3<sup>ABCG2</sup>) by 50% (IC<sub>50</sub>).

| PLX4032 (μM)         | cell viability in the absence of mitoxantrone (%) | IC <sub>50</sub> mitoxantrone (ng/mL) | fold sensitisation relative to mitoxantrone alone |
|----------------------|---------------------------------------------------|---------------------------------------|---------------------------------------------------|
| 0                    | 100.00 ± 0.00                                     | 0.22 ± 0.07                           | 1.00                                              |
| 0.625                | 97.22 ± 11.51                                     | 0.23 ± 0.03                           | 0.96                                              |
| 1.25                 | 99.12 ± 9.51                                      | 0.24 ± 0.07                           | 0.92                                              |
| 2.5                  | 95.48 ± 10.02                                     | 0.20 ± 0.06                           | 1.10                                              |
| 5                    | 89.01 ± 13.00                                     | 0.22 ± 0.03                           | 1.00                                              |
| 10                   | 78.61 ± 9.03                                      | 0.19 ± 0.05                           | 1.16                                              |
| 20                   | 50.13 ± 9.86                                      | 0.20 ± 0.04                           | 1.10                                              |
| fumitremorgin C (μM) |                                                   |                                       |                                                   |
| 10                   | 86.25 ± 9.25                                      | 0.20 ± 0.05                           | 1.10                                              |

**Suppl. Table 1E.** Influence of PLX4720 or the ABCG2 inhibitor fumitremorgin C on the concentration of the ABCG2 substrate mitoxantrone that decreases the viability of UKF-NB-3 cells transduced with an empty control vector (as comparison to UKF-NB-3<sup>ABCG2</sup>) by 50% (IC<sub>50</sub>).

| PLX4720 (μM)         | cell viability in the absence of mitoxantrone (%) | IC <sub>50</sub> mitoxantrone (ng/mL) | fold sensitisation relative to mitoxantrone alone |
|----------------------|---------------------------------------------------|---------------------------------------|---------------------------------------------------|
| 0                    | 100.00 ± 0.00                                     | 0.20 ± 0.05                           | 1.00                                              |
| 0.625                | 103.93 ± 9.84                                     | 0.18 ± 0.04                           | 1.11                                              |
| 1.25                 | 97.14 ± 14.22                                     | 0.22 ± 0.04                           | 0.91                                              |
| 2.5                  | 102.21 ± 7.26                                     | 0.19 ± 0.05                           | 1.05                                              |
| 5                    | 89.41 ± 13.37                                     | 0.17 ± 0.08                           | 1.18                                              |
| 10                   | 67.18 ± 8.62                                      | 0.19 ± 0.06                           | 1.05                                              |
| 20                   | 45.52 ± 11.08                                     | 0.19 ± 0.05                           | 1.05                                              |
| fumitremorgin C (μM) |                                                   |                                       |                                                   |
| 10                   | 87.49 ± 8.52                                      | 0.18 ± 0.06                           | 1.11                                              |
